# Supplementary material
Source: publisher figshare collection journal article supplement (https://karger.figshare.com/ndownloader/files/17427038)
Supplement: Supplementary file 1 [file 17427038]

**Supplementary Table 1.** **Kidney Disease Diagnostic Codes.**

These codes represent all kidney disease diagnostic codes used in this analysis. New-onset renal disease was defined as any code that appeared during the follow-up period, but was not present during screening.

| Code | Code Type | Description |
| --- | --- | --- |
| 285.21 | ICD-9 Dx | Anemia in chronic kidney disease |
| 405.01 | ICD-9 Dx | Secondary renovascular hypertension, malignant |
| 405.11 | ICD-9 Dx | Secondary renovascular hypertension, benign |
| 405.91 | ICD-9 Dx | Secondary renovascular hypertension, unspecified |
| 249.40 | ICD-9 Dx | Secondary diabetes mellitus with renal manifestations |
| 249.41 | ICD-9 Dx | Secondary diabetes mellitus with renal manifestations, uncontrolled |
| 250.40 | ICD-9 Dx | Diabetes with renal manifestations, type II or unspecified type, not stated as uncontrolled |
| 250.41 | ICD-9 Dx | Diabetes with renal manifestations, type I [juvenile type], not stated as uncontrolled |
| 250.42 | ICD-9 Dx | Diabetes with renal manifestations, type II or unspecified type, uncontrolled |
| 250.43 | ICD-9 Dx | Diabetes with renal manifestations, type I [juvenile type], uncontrolled |
| 403.00 | ICD-9 Dx | Hypertensive chronic kidney disease, malignant, with chronic kidney disease stage I through stage IV, or unspecified |
| 403.01 | ICD-9 Dx | Hypertensive chronic kidney disease, malignant, with chronic kidney disease stage V or end stage renal disease |
| 403.10 | ICD-9 Dx | Hypertensive chronic kidney disease, benign, with chronic kidney disease stage I through stage IV, or unspecified |
| 403.11 | ICD-9 Dx | Hypertensive chronic kidney disease, benign, with chronic kidney disease stage V or end stage renal disease |
| 403.90 | ICD-9 Dx | Hypertensive chronic kidney disease, unspecified, with chronic kidney disease stage I through stage IV, or unspecified |
| 403.91 | ICD-9 Dx | Hypertensive chronic kidney disease, unspecified, with chronic kidney disease stage V or end stage renal disease |
| 404.00 | ICD-9 Dx | Hypertensive heart and chronic kidney disease, malignant, without heart failure and with chronic kidney disease stage I through stage IV, or unspecified |
| 404.01 | ICD-9 Dx | Hypertensive heart and chronic kidney disease, malignant, with heart failure and with chronic kidney disease stage I through stage IV, or unspecified |
| 404.02 | ICD-9 Dx | Hypertensive heart and chronic kidney disease, malignant, without heart failure and with chronic kidney disease stage V or end stage renal disease |
| 404.03 | ICD-9 Dx | Hypertensive heart and chronic kidney disease, malignant, with heart failure and with chronic kidney disease stage V or end stage renal disease |
| 404.10 | ICD-9 Dx | Hypertensive heart and chronic kidney disease, benign, without heart failure and with chronic kidney disease stage I through stage IV, or unspecified |
| 404.11 | ICD-9 Dx | Hypertensive heart and chronic kidney disease, benign, with heart failure and with chronic kidney disease stage I through stage IV, or unspecified |
| 404.12 | ICD-9 Dx | Hypertensive heart and chronic kidney disease, benign, without heart failure and with chronic kidney disease stage V or end stage renal disease |
| 404.13 | ICD-9 Dx | Hypertensive heart and chronic kidney disease, benign, with heart failure and chronic kidney disease stage V or end stage renal disease |
| 404.90 | ICD-9 Dx | Hypertensive heart and chronic kidney disease, unspecified, without heart failure and with chronic kidney disease stage I through stage IV, or unspecified |
| 404.91 | ICD-9 Dx | Hypertensive heart and chronic kidney disease, unspecified, with heart failure and with chronic kidney disease stage I through stage IV, or unspecified |
| 404.92 | ICD-9 Dx | Hypertensive heart and chronic kidney disease, unspecified, without heart failure and with chronic kidney disease stage V or end stage renal disease |
| 404.93 | ICD-9 Dx | Hypertensive heart and chronic kidney disease, unspecified, with heart failure and chronic kidney disease stage V or end stage renal disease |
| 580.0 | ICD-9 Dx | Acute glomerulonephritis with lesion of proliferative glomerulonephritis |
| 580.4 | ICD-9 Dx | Acute glomerulonephritis with lesion of rapidly progressive glomerulonephritis |
| 580.81 | ICD-9 Dx | Acute glomerulonephritis with other specified pathological lesion in kidney in disease classified elsewhere |
| 580.89 | ICD-9 Dx | Other acute glomerulonephritis with other specified pathological lesion in kidney |
| 580.9 | ICD-9 Dx | Acute glomerulonephritis with unspecified pathological lesion in kidney |
| 581.0 | ICD-9 Dx | Nephrotic syndrome with lesion of proliferative glomerulonephritis |
| 581.1 | ICD-9 Dx | Nephrotic syndrome with lesion of membranous glomerulonephritis |
| 581.2 | ICD-9 Dx | Nephrotic syndrome with lesion of membranoproliferative glomerulonephritis |
| 581.3 | ICD-9 Dx | Nephrotic syndrome with lesion of minimal change glomerulonephritis |
| 581.81 | ICD-9 Dx | Nephrotic syndrome with other specified pathological lesion in kidney in diseases classified elsewhere |
| 581.89 | ICD-9 Dx | Other nephrotic syndrome with specified pathological lesion in kidney |
| 581.9 | ICD-9 Dx | Nephrotic syndrome with unspecified pathological lesion in kidney |
| 582.0 | ICD-9 Dx | Chronic glomerulonephritis with lesion of proliferative glomerulonephritis |
| 582.1 | ICD-9 Dx | Chronic glomerulonephritis with lesion of membranous glomerulonephritis |
| 582.2 | ICD-9 Dx | Chronic glomerulonephritis with lesion of membranoproliferative glomerulonephritis |
| 582.4 | ICD-9 Dx | Chronic glomerulonephritis with lesion of rapidly progressive glomerulonephritis |
| 582.81 | ICD-9 Dx | Chronic glomerulonephritis with other specified pathological lesion in kidney in diseases classified elsewhere |
| 582.89 | ICD-9 Dx | Other chronic glomerulonephritis with specified pathological lesion in kidney |
| 582.9 | ICD-9 Dx | Chronic glomerulonephritis with unspecified pathological lesion in kidney |
| 583.0 | ICD-9 Dx | Nephritis and nephropathy, not specified as acute or chronic, with lesion of proliferative glomerulonephritis |
| 583.1 | ICD-9 Dx | Nephritis and nephropathy, not specified as acute or chronic, with lesion of membranous glomerulonephritis |
| 583.2 | ICD-9 Dx | Nephritis and nephropathy, not specified as acute or chronic, with lesion of membranoproliferative glomerulonephritis |
| 583.4 | ICD-9 Dx | Nephritis and nephropathy, not specified as acute or chronic, with lesion of rapidly progressive glomerulonephritis |
| 583.6 | ICD-9 Dx | Nephritis and nephropathy, not specified as acute or chronic, with lesion of renal cortical necrosis |
| 583.7 | ICD-9 Dx | Nephritis and nephropathy, not specified as acute or chronic, with lesion of renal medullary necrosis |
| 583.81 | ICD-9 Dx | Nephritis and nephropathy, not specified as acute or chronic, with other specified pathological lesion in kidney, in diseases classified elsewhere |
| 583.89 | ICD-9 Dx | Other nephritis and nephropathy, not specified as acute or chronic, with specified pathological lesion in kidney |
| 583.9 | ICD-9 Dx | Nephritis and nephropathy, not specified as acute or chronic, with unspecified pathological lesion in kidney |
| 584.5 | ICD-9 Dx | Acute kidney failure with lesion of tubular necrosis |
| 584.6 | ICD-9 Dx | Acute kidney failure with lesion of renal cortical necrosis |
| 584.7 | ICD-9 Dx | Acute kidney failure with lesion of medullary [papillary] necrosis |
| 584.8 | ICD-9 Dx | Acute kidney failure with other specified pathological lesion in kidney |
| 584.9 | ICD-9 Dx | Acute kidney failure, unspecified |
| 585.1 | ICD-9 Dx | Chronic kidney disease, Stage I |
| 585.2 | ICD-9 Dx | Chronic kidney disease, Stage II (mild) |
| 585.3 | ICD-9 Dx | Chronic kidney disease, Stage III (moderate) |
| 585.4 | ICD-9 Dx | Chronic kidney disease, Stage IV (severe) |
| 585.5 | ICD-9 Dx | Chronic kidney disease, Stage V |
| 585.6 | ICD-9 Dx | End stage renal disease |
| 585.9 | ICD-9 Dx | Chronic kidney disease, unspecified |
| 586 | ICD-9 Dx | Unspecified renal failure |
| 587 | ICD-9 Dx | Unspecified renal sclerosis |
| 588.0 | ICD-9 Dx | Renal osteodystrophy |
| 588.1 | ICD-9 Dx | Nephrogenic diabetes insipidus |
| 588.81 | ICD-9 Dx | Secondary hyperparathyroidism (of renal origin) |
| 588.89 | ICD-9 Dx | Other specified disorders resulting from impaired renal function |
| 588.9 | ICD-9 Dx | Unspecified disorder resulting from impaired renal function |
| 589.0 | ICD-9 Dx | Unilateral small kidney |
| 589.1 | ICD-9 Dx | Bilateral small kidneys |
| 589.9 | ICD-9 Dx | Unspecified small kidney |
| 590.00 | ICD-9 Dx | Chronic pyelonephritis without lesion of renal medullary necrosis |
| 590.01 | ICD-9 Dx | Chronic pyelonephritis with lesion of renal medullary necrosis |
| 590.10 | ICD-9 Dx | Acute pyelonephritis without lesion of renal medullary necrosis |
| 590.11 | ICD-9 Dx | Acute pyelonephritis with lesion of renal medullary necrosis |
| 590.2 | ICD-9 Dx | Renal and perinephric abscess |
| 590.3 | ICD-9 Dx | Pyeloureteritis cystica |
| 590.80 | ICD-9 Dx | Unspecified pyelonephritis |
| 590.81 | ICD-9 Dx | Pyelitis or pyelonephritis in diseases classified elsewhere |
| 590.9 | ICD-9 Dx | Unspecified infection of kidney |
| 591 | ICD-9 Dx | Hydronephrosis |
| 593.1 | ICD-9 Dx | Hypertrophy of kidney |
| 593.2 | ICD-9 Dx | Acquired cyst of kidney |
| 593.6 | ICD-9 Dx | Postural proteinuria |
| 593.71 | ICD-9 Dx | Vesicoureteral reflux with reflux nephropathy, unilateral |
| 593.72 | ICD-9 Dx | Vesicoureteral reflux with reflux nephropathy, bilateral |
| 593.73 | ICD-9 Dx | Vesicoureteral reflux with reflux nephropathy, NOS |
| 593.81 | ICD-9 Dx | Vascular disorders of kidney |
| 599.70 | ICD-9 Dx | Hematuria, unspecified |
| 599.71 | ICD-9 Dx | Gross hematuria |
| 599.72 | ICD-9 Dx | Microscopic hematuria |
| 728.88 | ICD-9 Dx | Rhabdomyolysis |
| M6282 | ICD-10 Dx | Rhabdomyolysis |
| N000 | ICD-10 Dx | Acute nephritic syndrome with minor glomerular abnormality |
| N001 | ICD-10 Dx | Acute nephritic syndrome with focal and segmental glomerular lesions |
| N002 | ICD-10 Dx | Acute nephritic syndrome with diffuse membranous glomerulonephritis |
| N003 | ICD-10 Dx | Acute nephritic syndrome with diffuse mesangial proliferative glomerulonephritis |
| N004 | ICD-10 Dx | Acute nephritic syndrome with diffuse endocapillary proliferative glomerulonephritis |
| N005 | ICD-10 Dx | Acute nephritic syndrome with diffuse mesangiocapillary glomerulonephritis |
| N006 | ICD-10 Dx | Acute nephritic syndrome with dense deposit disease |
| N007 | ICD-10 Dx | Acute nephritic syndrome with diffuse crescentic glomerulonephritis |
| N008 | ICD-10 Dx | Acute nephritic syndrome with other morphologic changes |
| N009 | ICD-10 Dx | Acute nephritic syndrome with unspecified morphologic changes |
| N010 | ICD-10 Dx | Rapidly progressive nephritic syndrome with minor glomerular abnormality |
| N011 | ICD-10 Dx | Rapidly progressive nephritic syndrome with focal and segmental glomerular lesions |
| N012 | ICD-10 Dx | Rapidly progressive nephritic syndrome with diffuse membranous glomerulonephritis |
| N013 | ICD-10 Dx | Rapidly progressive nephritic syndrome with diffuse mesangial proliferative glomerulonephritis |
| N014 | ICD-10 Dx | Rapidly progressive nephritic syndrome with diffuse endocapillary proliferative glomerulonephritis |
| N015 | ICD-10 Dx | Rapidly progressive nephritic syndrome with diffuse mesangiocapillary glomerulonephritis |
| N016 | ICD-10 Dx | Rapidly progressive nephritic syndrome with dense deposit disease |
| N017 | ICD-10 Dx | Rapidly progressive nephritic syndrome with diffuse crescentic glomerulonephritis |
| N018 | ICD-10 Dx | Rapidly progressive nephritic syndrome with other morphologic changes |
| N019 | ICD-10 Dx | Rapidly progressive nephritic syndrome with unspecified morphologic changes |
| N020 | ICD-10 Dx | Recurrent and persistent hematuria with minor glomerular abnormality |
| N021 | ICD-10 Dx | Recurrent and persistent hematuria with focal and segmental glomerular lesions |
| N022 | ICD-10 Dx | Recurrent and persistent hematuria with diffuse membranous glomerulonephritis |
| N023 | ICD-10 Dx | Recurrent and persistent hematuria with diffuse mesangial proliferative glomerulonephritis |
| N024 | ICD-10 Dx | Recurrent and persistent hematuria with diffuse endocapillary proliferative glomerulonephritis |
| N025 | ICD-10 Dx | Recurrent and persistent hematuria with diffuse mesangiocapillary glomerulonephritis |
| N026 | ICD-10 Dx | Recurrent and persistent hematuria with dense deposit disease |
| N027 | ICD-10 Dx | Recurrent and persistent hematuria with diffuse crescentic glomerulonephritis |
| N028 | ICD-10 Dx | Recurrent and persistent hematuria with other morphologic changes |
| N029 | ICD-10 Dx | Recurrent and persistent hematuria with unspecified morphologic changes |
| N030 | ICD-10 Dx | Chronic nephritic syndrome with minor glomerular abnormality |
| N031 | ICD-10 Dx | Chronic nephritic syndrome with focal and segmental glomerular lesions |
| N032 | ICD-10 Dx | Chronic nephritic syndrome with diffuse membranous glomerulonephritis |
| N033 | ICD-10 Dx | Chronic nephritic syndrome with diffuse mesangial proliferative glomerulonephritis |
| N034 | ICD-10 Dx | Chronic nephritic syndrome with diffuse endocapillary proliferative glomerulonephritis |
| N035 | ICD-10 Dx | Chronic nephritic syndrome with diffuse mesangiocapillary glomerulonephritis |
| N036 | ICD-10 Dx | Chronic nephritic syndrome with dense deposit disease |
| N037 | ICD-10 Dx | Chronic nephritic syndrome with diffuse crescentic glomerulonephritis |
| N038 | ICD-10 Dx | Chronic nephritic syndrome with other morphologic changes |
| N039 | ICD-10 Dx | Chronic nephritic syndrome with unspecified morphologic changes |
| N040 | ICD-10 Dx | Nephrotic syndrome with minor glomerular abnormality |
| N041 | ICD-10 Dx | Nephrotic syndrome with focal and segmental glomerular lesions |
| N042 | ICD-10 Dx | Nephrotic syndrome with diffuse membranous glomerulonephritis |
| N043 | ICD-10 Dx | Nephrotic syndrome with diffuse mesangial proliferative glomerulonephritis |
| N044 | ICD-10 Dx | Nephrotic syndrome with diffuse endocapillary proliferative glomerulonephritis |
| N045 | ICD-10 Dx | Nephrotic syndrome with diffuse mesangiocapillary glomerulonephritis |
| N046 | ICD-10 Dx | Nephrotic syndrome with dense deposit disease |
| N047 | ICD-10 Dx | Nephrotic syndrome with diffuse crescentic glomerulonephritis |
| N048 | ICD-10 Dx | Nephrotic syndrome with other morphologic changes |
| N049 | ICD-10 Dx | Nephrotic syndrome with unspecified morphologic changes |
| N050 | ICD-10 Dx | Unspecified nephritic syndrome with minor glomerular abnormality |
| N051 | ICD-10 Dx | Unspecified nephritic syndrome with focal and segmental glomerular lesions |
| N052 | ICD-10 Dx | Unspecified nephritic syndrome with diffuse membranous glomerulonephritis |
| N053 | ICD-10 Dx | Unspecified nephritic syndrome with diffuse mesangial proliferative glomerulonephritis |
| N054 | ICD-10 Dx | Unspecified nephritic syndrome with diffuse endocapillary proliferative glomerulonephritis |
| N055 | ICD-10 Dx | Unspecified nephritic syndrome with diffuse mesangiocapillary glomerulonephritis |
| N056 | ICD-10 Dx | Unspecified nephritic syndrome with dense deposit disease |
| N057 | ICD-10 Dx | Unspecified nephritic syndrome with diffuse crescentic glomerulonephritis |
| N058 | ICD-10 Dx | Unspecified nephritic syndrome with other morphologic changes |
| N059 | ICD-10 Dx | Unspecified nephritic syndrome with unspecified morphologic changes |
| N060 | ICD-10 Dx | Isolated proteinuria with minor glomerular abnormality |
| N061 | ICD-10 Dx | Isolated proteinuria with focal and segmental glomerular lesions |
| N062 | ICD-10 Dx | Isolated proteinuria with diffuse membranous glomerulonephritis |
| N063 | ICD-10 Dx | Isolated proteinuria with diffuse mesangial proliferative glomerulonephritis |
| N064 | ICD-10 Dx | Isolated proteinuria with diffuse endocapillary proliferative glomerulonephritis |
| N065 | ICD-10 Dx | Isolated proteinuria with diffuse mesangiocapillary glomerulonephritis |
| N066 | ICD-10 Dx | Isolated proteinuria with dense deposit disease |
| N067 | ICD-10 Dx | Isolated proteinuria with diffuse crescentic glomerulonephritis |
| N068 | ICD-10 Dx | Isolated proteinuria with other morphologic lesion |
| N069 | ICD-10 Dx | Isolated proteinuria with unspecified morphologic lesion |
| N070 | ICD-10 Dx | Hereditary nephropathy, not elsewhere classified with minor glomerular abnormality |
| N071 | ICD-10 Dx | Hereditary nephropathy, not elsewhere classified with focal and segmental glomerular lesions |
| N072 | ICD-10 Dx | Hereditary nephropathy, not elsewhere classified with diffuse membranous glomerulonephritis |
| N073 | ICD-10 Dx | Hereditary nephropathy, not elsewhere classified with diffuse mesangial proliferative glomerulonephritis |
| N074 | ICD-10 Dx | Hereditary nephropathy, not elsewhere classified with diffuse endocapillary proliferative glomerulonephritis |
| N075 | ICD-10 Dx | Hereditary nephropathy, not elsewhere classified with diffuse mesangiocapillary glomerulonephritis |
| N076 | ICD-10 Dx | Hereditary nephropathy, not elsewhere classified with dense deposit disease |
| N077 | ICD-10 Dx | Hereditary nephropathy, not elsewhere classified with diffuse crescentic glomerulonephritis |
| N078 | ICD-10 Dx | Hereditary nephropathy, not elsewhere classified with other morphologic lesions |
| N079 | ICD-10 Dx | Hereditary nephropathy, not elsewhere classified with unspecified morphologic lesions |
| N08 | ICD-10 Dx | Glomerular disorders in diseases classified elsewhere |
| N10 | ICD-10 Dx | Acute tubulo-interstitial nephritis |
| N110 | ICD-10 Dx | Nonobstructive reflux-associated chronic pyelonephritis |
| N111 | ICD-10 Dx | Chronic obstructive pyelonephritis |
| N118 | ICD-10 Dx | Other chronic tubulo-interstitial nephritis |
| N119 | ICD-10 Dx | Chronic tubulo-interstitial nephritis, unspecified |
| N12 | ICD-10 Dx | Tubulo-interstitial nephritis, not specified as acute or chronic |
| N131 | ICD-10 Dx | Hydronephrosis with ureteral stricture, not elsewhere classified |
| N132 | ICD-10 Dx | Hydronephrosis with renal and ureteral calculous obstruction |
| N1330 | ICD-10 Dx | Unspecified hydronephrosis |
| N1339 | ICD-10 Dx | Other hydronephrosis |
| N134 | ICD-10 Dx | Hydroureter |
| N136 | ICD-10 Dx | Pyonephrosis |
| N1370 | ICD-10 Dx | Vesicoureteral-reflux, unspecified |
| N1371 | ICD-10 Dx | Vesicoureteral-reflux without reflux nephropathy |
| N13721 | ICD-10 Dx | Vesicoureteral-reflux with reflux nephropathy without hydroureter, unilateral |
| N13722 | ICD-10 Dx | Vesicoureteral-reflux with reflux nephropathy without hydroureter, bilateral |
| N13729 | ICD-10 Dx | Vesicoureteral-reflux with reflux nephropathy without hydroureter, unspecified |
| N13731 | ICD-10 Dx | Vesicoureteral-reflux with reflux nephropathy with hydroureter, unilateral |
| N13732 | ICD-10 Dx | Vesicoureteral-reflux with reflux nephropathy with hydroureter, bilateral |
| N13739 | ICD-10 Dx | Vesicoureteral-reflux with reflux nephropathy with hydroureter, unspecified |
| N138 | ICD-10 Dx | Other obstructive and reflux uropathy |
| N139 | ICD-10 Dx | Obstructive and reflux uropathy, unspecified |
| N140 | ICD-10 Dx | Analgesic nephropathy |
| N141 | ICD-10 Dx | Nephropathy induced by other drugs, medicaments and biological substances |
| N142 | ICD-10 Dx | Nephropathy induced by unspecified drug, medicament or biological substance |
| N143 | ICD-10 Dx | Nephropathy induced by heavy metals |
| N144 | ICD-10 Dx | Toxic nephropathy, not elsewhere classified |
| N150 | ICD-10 Dx | Balkan nephropathy |
| N151 | ICD-10 Dx | Renal and perinephric abscess |
| N158 | ICD-10 Dx | Other specified renal tubulo-interstitial diseases |
| N159 | ICD-10 Dx | Renal tubulo-interstitial disease, unspecified |
| N16 | ICD-10 Dx | Renal tubulo-interstitial disorders in diseases classified elsewhere |
| N170 | ICD-10 Dx | Acute kidney failure with tubular necrosis |
| N171 | ICD-10 Dx | Acute kidney failure with acute cortical necrosis |
| N172 | ICD-10 Dx | Acute kidney failure with medullary necrosis |
| N178 | ICD-10 Dx | Other acute kidney failure |
| N179 | ICD-10 Dx | Acute kidney failure, unspecified |
| N181 | ICD-10 Dx | Chronic kidney disease, stage 1 |
| N182 | ICD-10 Dx | Chronic kidney disease, stage 2 (mild) |
| N183 | ICD-10 Dx | Chronic kidney disease, stage 3 (moderate) |
| N184 | ICD-10 Dx | Chronic kidney disease, stage 4 (severe) |
| N185 | ICD-10 Dx | Chronic kidney disease, stage 5 |
| N186 | ICD-10 Dx | End stage renal disease |
| N189 | ICD-10 Dx | Chronic kidney disease, unspecified |
| N19 | ICD-10 Dx | Unspecified kidney failure |
| N23 | ICD-10 Dx | Unspecified renal colic |
| N250 | ICD-10 Dx | Renal osteodystrophy |
| N251 | ICD-10 Dx | Nephrogenic diabetes insipidus |
| N2581 | ICD-10 Dx | Secondary hyperparathyroidism of renal origin |
| N2589 | ICD-10 Dx | Other disorders resulting from impaired renal tubular function |
| N259 | ICD-10 Dx | Disorder resulting from impaired renal tubular function, unspecified |
| N261 | ICD-10 Dx | Atrophy of kidney (terminal) |
| N262 | ICD-10 Dx | Page kidney |
| N269 | ICD-10 Dx | Renal sclerosis, unspecified |
| N270 | ICD-10 Dx | Small kidney, unilateral |
| N271 | ICD-10 Dx | Small kidney, bilateral |
| N279 | ICD-10 Dx | Small kidney, unspecified |
| N280 | ICD-10 Dx | Ischemia and infarction of kidney |
| N281 | ICD-10 Dx | Cyst of kidney, acquired |
| N2881 | ICD-10 Dx | Hypertrophy of kidney |
